# Supplementary material for: Phthalate migration and its effects on poly(vinyl chloride)-based footwear: pathways, influence of environmental conditions, and the possibility of human exposure
Source: Royal Society of Chemistry journal article supplement (doi:10.1039/d2em00059h), 2022-01-01
Supplement: d2em00059h1.pdf [file d2em00059h1.pdf]

**Title: Phthalate migration and its effects in poly(vinyl chloride)-based footwear: pathways, influence of environmental conditions, and the possibility of human exposure**

Sujata Mandal\*<sup>‡</sup>, S. Suresh, N. Priya, Ravi Bonathu, R. Mohan, K.J. Sreeram

CLRI Center for Analysis, Testing, Evaluation and Reporting Services (CATERS), CSIR-Central Leather Research Institute (CLRI), Chennai-600020, India

<sup>‡</sup>Present address: Centre for Human and Organizational Resources Development (CHORD), CSIR – Central Leather Research Institute, Chennai- 600020, India

\*Corresponding Author's Contact: Phone +91 44 24437104; Fax: +91-44-24450901

Email: [sujata@clri.res.in](mailto:sujata@clri.res.in); [sujatamandal@rediffmail.com](mailto:sujatamandal@rediffmail.com)

ORCID ID: 0000-0002-0549-8851

Table S1. Quantification ions for the restricted phthalates.

| Phthalate                                         | Target ion | Qualifier Ions |     |
|---------------------------------------------------|------------|----------------|-----|
|                                                   |            | Q1             | Q2  |
| Di-butyl phthalate (DBP)                          | 149        | 223            | 205 |
| Butyl benzyl phthalate (BBP)                      | 149        | 206            | 238 |
| Di-(2-ethylhexyl) phthalate (DEHP)                | 149        | 167            | 279 |
| Di-n-octyl phthalate (DNOP)                       | 149        | 279            | 261 |
| Di-cyclohexyl phthalate (DCHP), Internal standard | 149        | 167            | 249 |
| Di-isobutyl phthalate (DIBP)                      | 149        | 223            | 205 |
